# Supplementary material for: Cellular Disposal of miR23b by RAB27-Dependent Exosome Release Is Linked to Acquisition of Metastatic Properties
Source: Oxford University Press journal article supplement (doi:10.1158/0008-5472.can-13-3512), 2014-09-26
Supplement: 00085472can133512-sup-123865_1_supp_2556866_n8h1bt.pdf [file 00085472can133512-sup-123865_1_supp_2556866_n8h1bt.pdf]

**A***Summary of high-throughput mass spectrometry analysis of T24, FL3, and SLT4 exosomes*

|               |             |
|---------------|-------------|
| Drosha        | -           |
| Dicer         | -           |
| Ago1          | (-, in 1/3) |
| Ago2          | (-, in 1/3) |
| TNRC6A/ GW182 | -           |
| TARBP2P/ TRBP | -           |

**B**

| Selected miRNAs |              | Presence in exosomes derived from: |                  |
|-----------------|--------------|------------------------------------|------------------|
| <i>Group</i>    | <i>miRNA</i> | <i>Carcinoma cells</i>             | <i>NHU cells</i> |
| 1               | miR-885-5p   | + (all five)                       | -                |
|                 | miR-145      | + (all five)                       | -                |
|                 | miR-223      | + (all five)                       | -                |
| 2               | miR-23b      | + (T24, SLT4, FL3)                 | -                |
|                 | miR-921      | + (SLT4, FL3, LUL2)                | -                |
|                 | miR-224      | + (all five)                       | +                |

**C**

## Downregulated upon RAB27B knockdown (&gt;2 fold)

| <i>Type</i>                        | <i>Molecules</i>                                |
|------------------------------------|-------------------------------------------------|
| Rab GTPases                        | RAB27B                                          |
| Rho GTPase activating proteins     | ARHGAP11A, -11B                                 |
| Kinesins                           | KIF2C, 4B, 4C, C1, 11, 14, 15, 18A, 20B, 23, 24 |
| Ubiquitin conjugating enzymes      | UBE2T, UBE2C                                    |
| Histone cluster 1                  | HIST1H2AI,-H2BM, -H1C, -H3F, -H4J, -H1B         |
| Histone cluster 2                  | HIST2H3A, -H2AB                                 |
| Kinetochores associated proteins   | KNTC1, SKA1, SKA3, ZWILCH                       |
| Polo-like kinases                  | PLK1, PLK4                                      |
| Cyclin-dep. kinases and inhibitors | CDK1, CDK17, CDK2AP2, CDKN3, CDKN2B             |
